# Supplementary material for: Enhancing Commercial Antibiotics with Trans-Cinnamaldehyde in Gram-Positive and Gram-Negative Bacteria: An In Vitro Approach
Source: MDPI journal article supplement (doi:10.3390/plants13020192), 2024-01-10
Supplement: s1 [file s1]

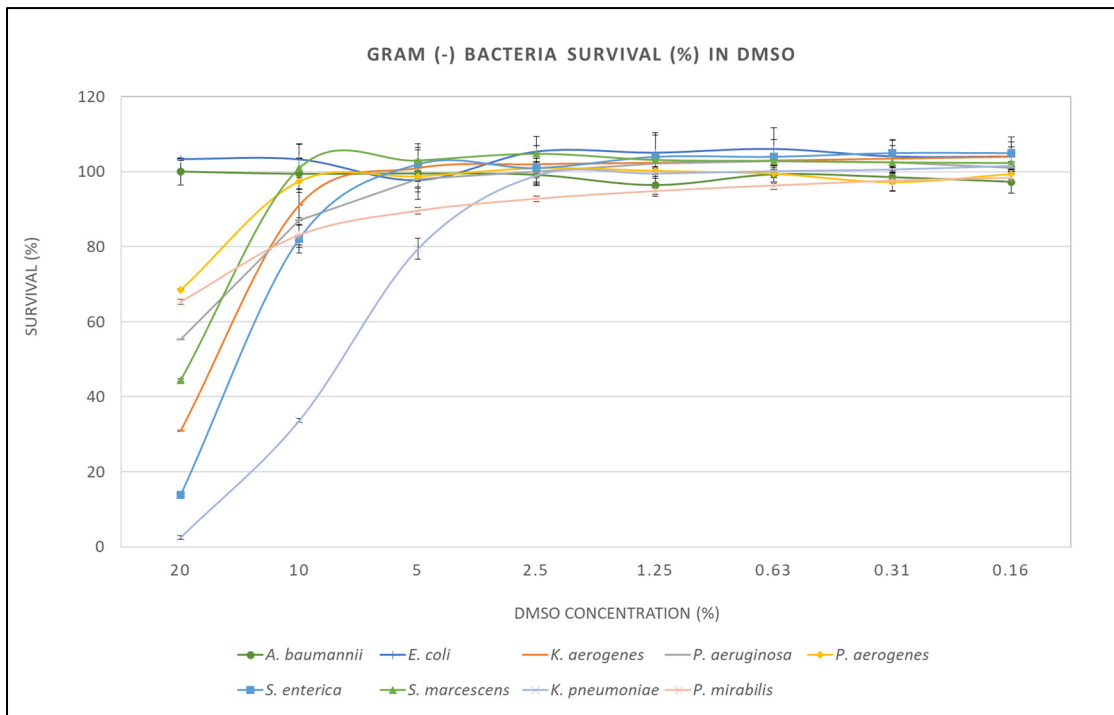

(a)

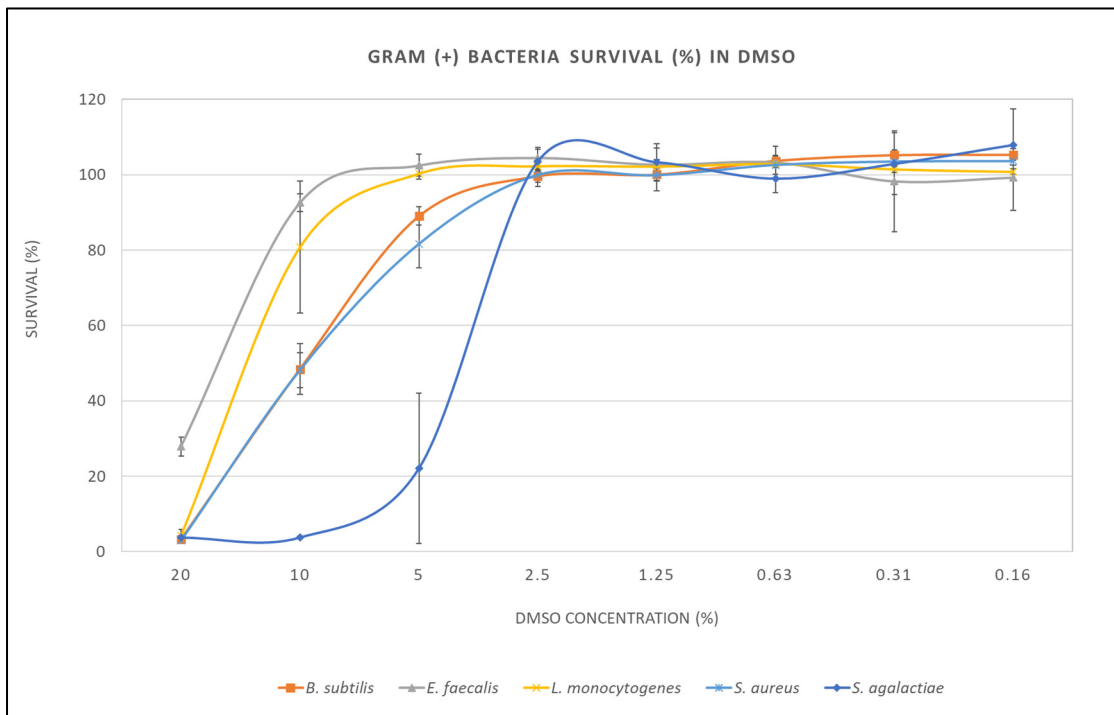

(b)

**Figure S1.** Survival (%) of **a)** Gram (-) bacteria and **b)** Gram (+) bacteria (B) tested in this work when exposed to different dilutions of DMSO.

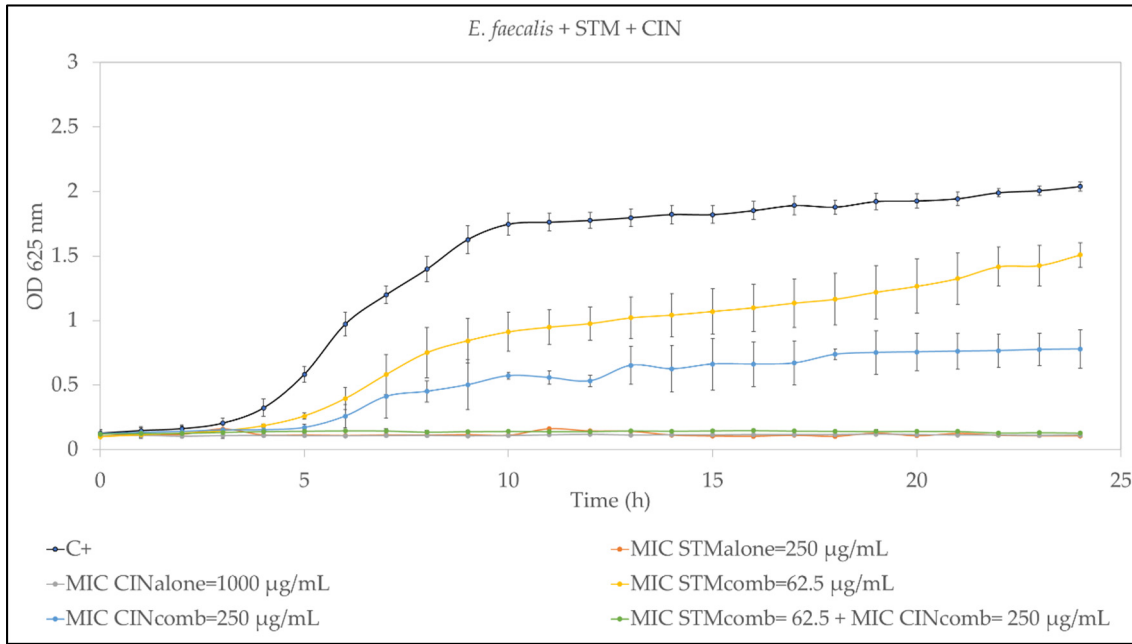

(a)

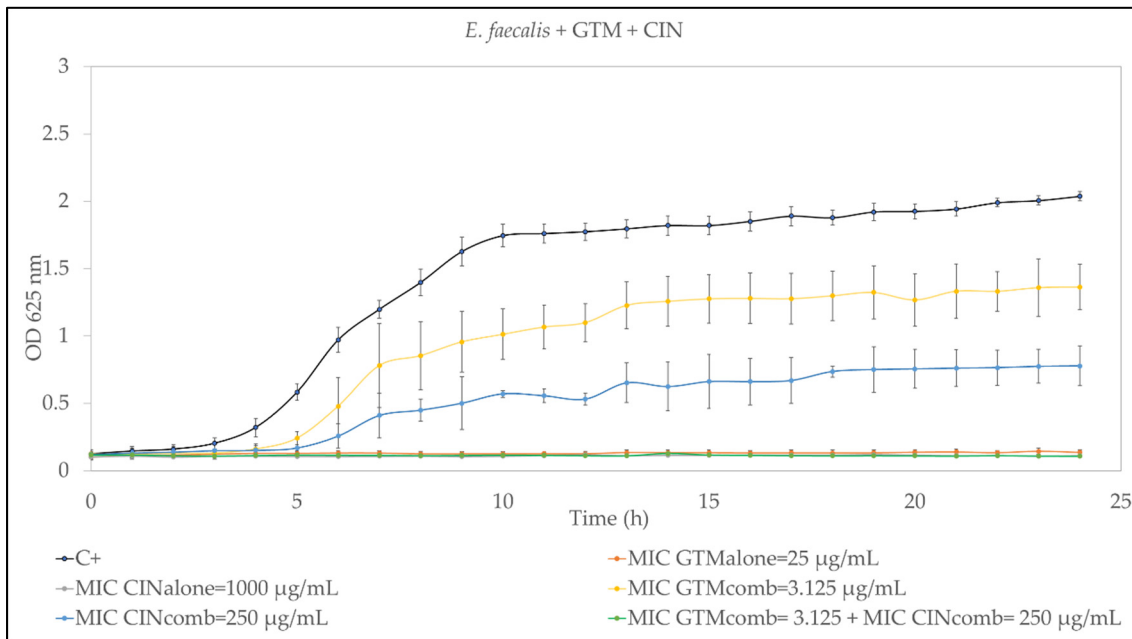

(b)

**Figure S2.** Kinetic study for cinnamaldehyde (CIN) and **a)** streptomycin (STM) or **b)** gentamicin (GTM) on *E. faecalis* (OD at 625 nm vs time (h)). C+: curve for positive control. MIC CIN<sub>alone</sub> and MIC ABX<sub>alone</sub> are the curves for CIN and the specific ABX, respectively, when each of them was tested alone at their respective MIC. MIC ABX<sub>comb</sub> is the curve for the specific ABX tested alone but added at its MIC when this and CIN were tested simultaneously. MIC CIN<sub>comb</sub> is the curve for CIN tested alone but added at its MIC when this and the specific ABX were tested simultaneously. (MIC ABX<sub>comb</sub>+MIC CIN<sub>comb</sub>) is the curve for the combination of the mixture of the specific ABX and CIN when tested simultaneously at their respective MICs in combination. Data are given as mean ± standard deviation.

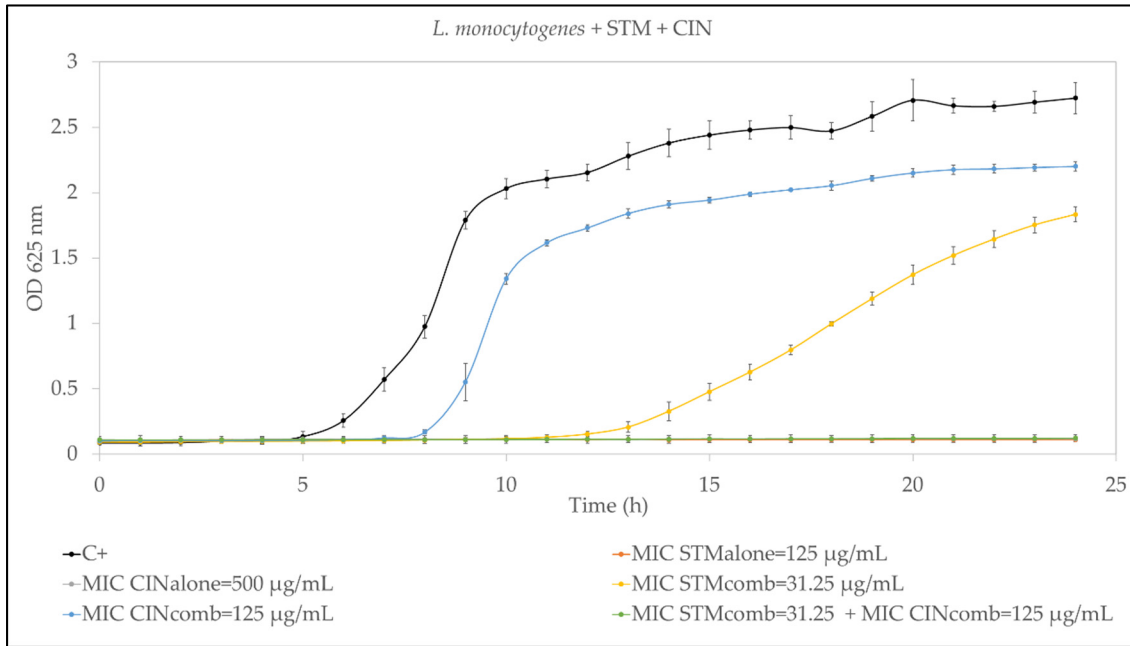

(a)

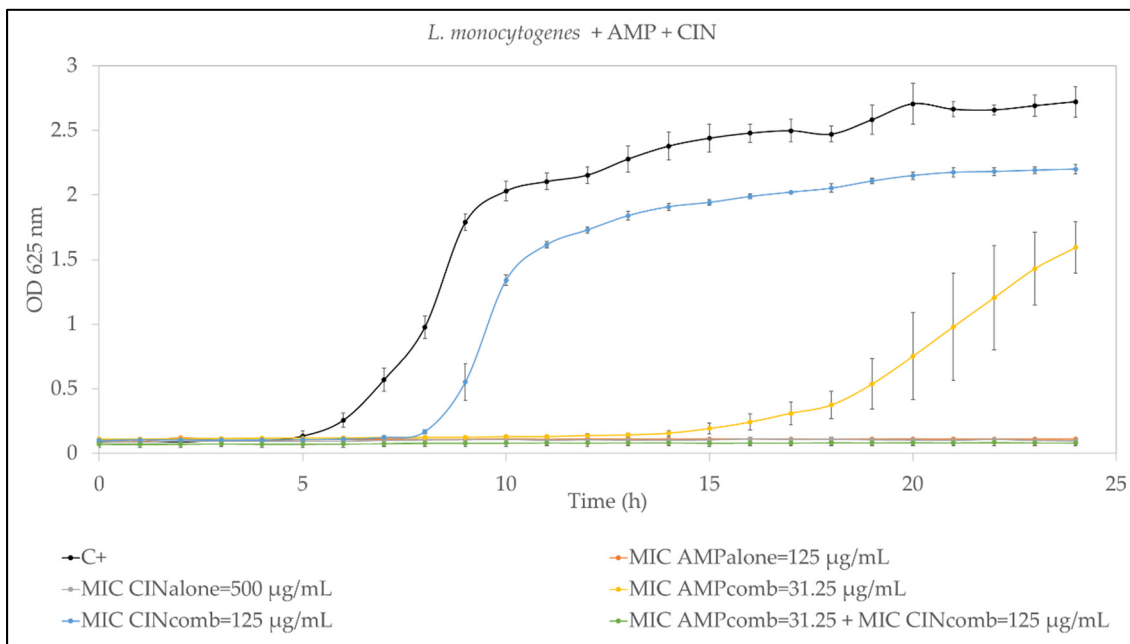

(b)

**Figure S3.** Kinetic study for cinnamaldehyde (CIN) and **a)** streptomycin (STM) or **b)** ampicillin (AMP) on *L. monocytogenes* (OD at 625 nm vs time (h)). C+: curve for positive control. MIC CIN<sub>alone</sub> and MIC ABX<sub>alone</sub> are the curves for CIN and the specific ABX, respectively, when each of them was tested alone at their respective MIC. MIC ABX<sub>comb</sub> is the curve for the specific ABX tested alone but added at its MIC when this and CIN were tested simultaneously. MIC CIN<sub>comb</sub> is the curve for CIN tested alone but added at its MIC when this and the specific ABX were tested simultaneously. (MIC ABX<sub>comb</sub>+MIC CIN<sub>comb</sub>) is the curve for the combination of the mixture of the specific ABX and CIN when tested simultaneously at their respective MICs in combination. Data are given as mean  $\pm$  standard deviation.

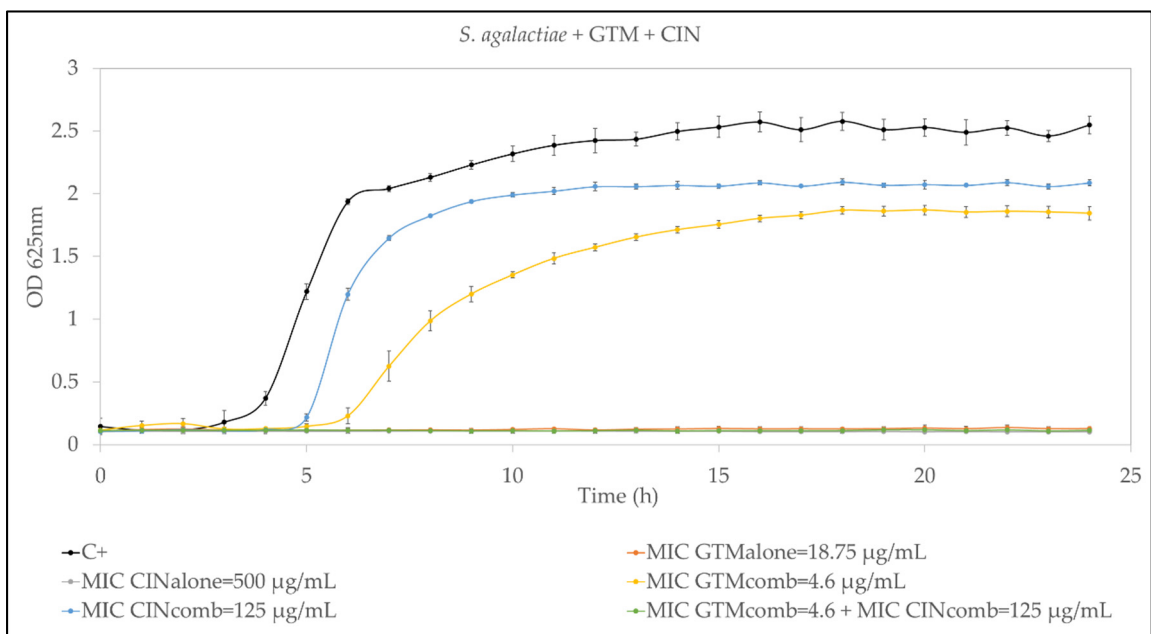

(a)

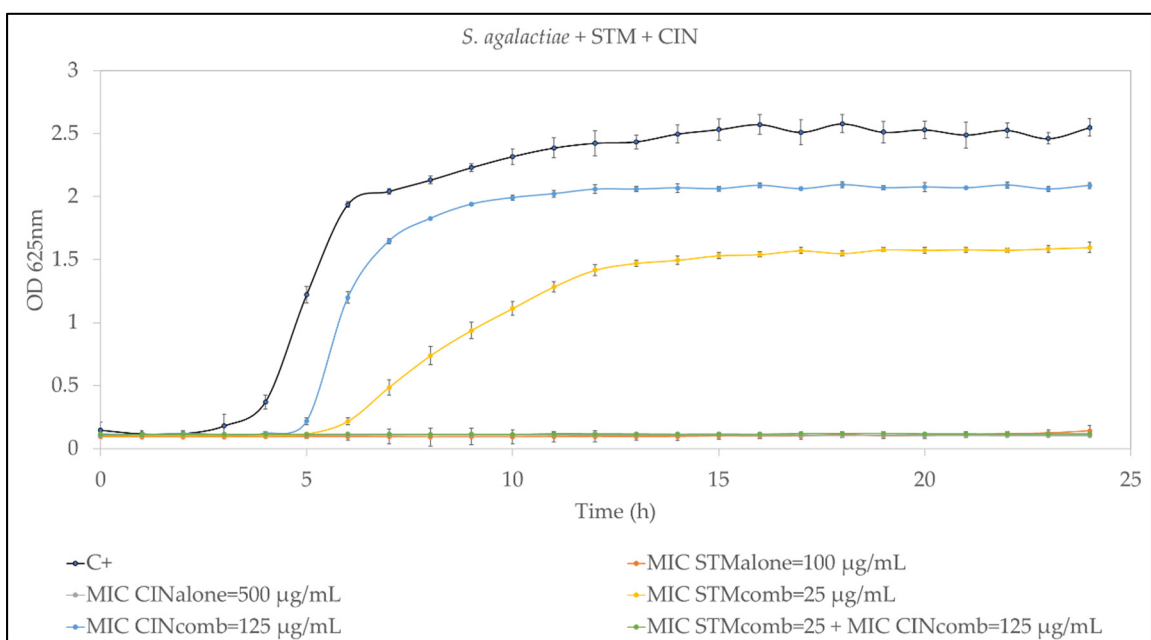

(b)

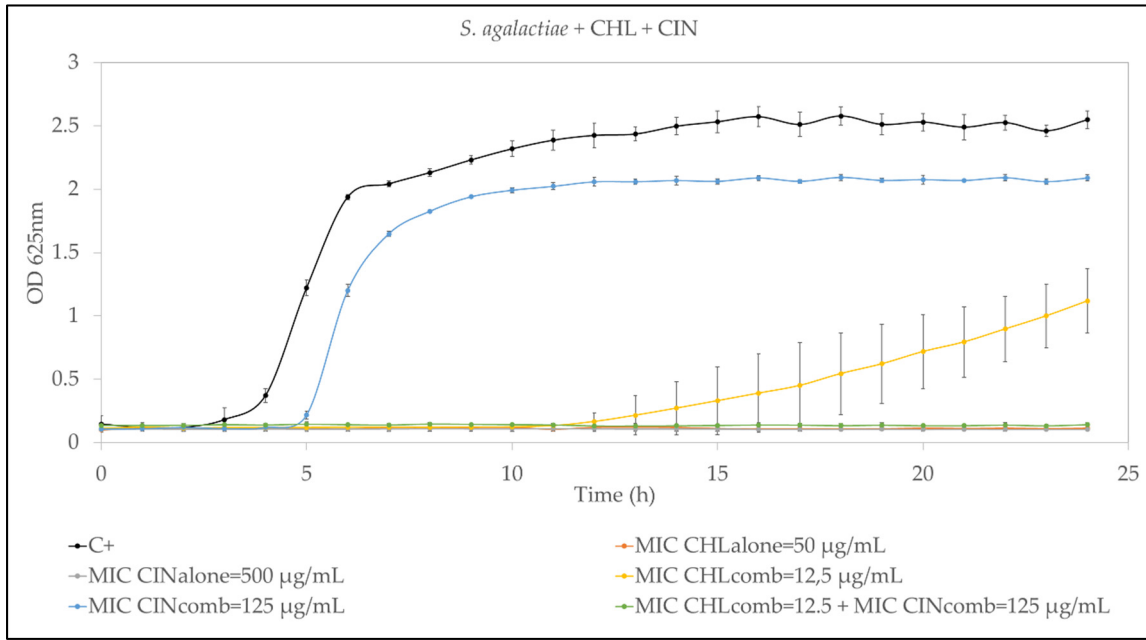

(c)

**Figure S4.** Kinetic study for cinnamaldehyde (CIN) and **a)** gentamicin (GTM) or **b)** streptomycin (STP) or **c)** chloramphenicol (CHL) on *S. agalactiae* (OD at 625 nm vs time (h)) . C+: curve for positive control. MIC CIN<sub>alone</sub> and MIC ABX<sub>alone</sub> are the curves for CIN and the specific ABX, respectively, when each of them was tested alone at their respective MIC. MIC ABX<sub>comb</sub> is the curve for the specific ABX tested alone but added at its MIC when this and CIN were tested simultaneously. MIC CIN<sub>comb</sub> is the curve for CIN tested alone but added at its MIC when this and the specific ABX were tested simultaneously. (MIC ABX<sub>comb</sub>+MIC CIN<sub>comb</sub>) is the curve for the combination of the mixture of the specific ABX and CIN when tested simultaneously at their respective MICs in combination. Data are given as mean ± standard deviation.

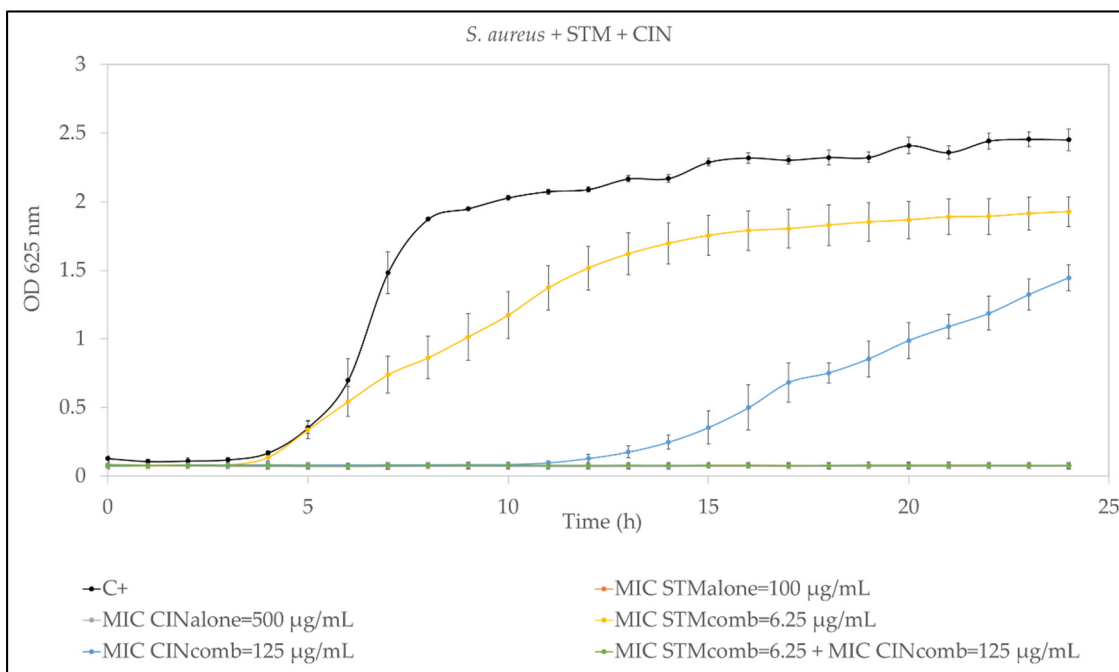

(a)

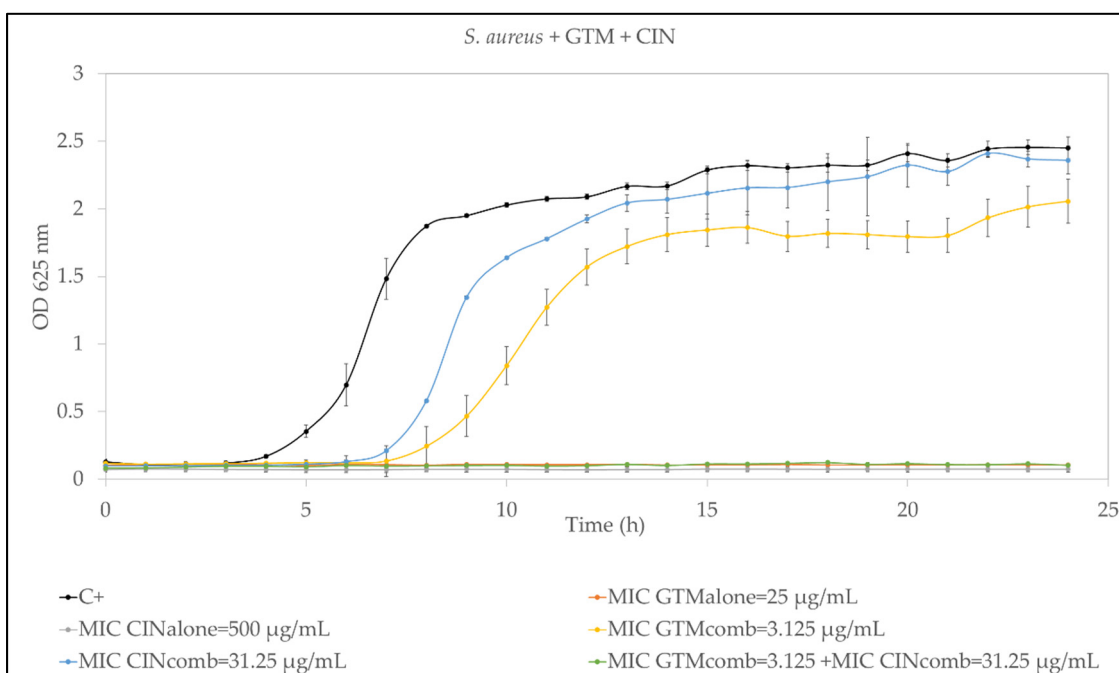

(b)

**Figure S5.** Kinetic study for cinnamaldehyde (CIN) and **a)** streptomycin (STM) or **b)** gentamicin (GTM) on *S. aureus* (OD at 625 nm vs time (h)). C+: curve for positive control. MIC CIN<sub>alone</sub> and MIC ABX<sub>alone</sub> are the curves for CIN and the specific ABX, respectively, when each of them was tested alone at their respective MIC. MIC ABX<sub>comb</sub> is the curve for the specific ABX tested alone but added at its MIC when this and CIN were tested simultaneously. MIC CIN<sub>comb</sub> is the curve for CIN tested alone but added at its MIC when this and the specific ABX were tested simultaneously. (MIC ABX<sub>comb</sub>+MIC CIN<sub>comb</sub>) is the curve for the combination of the mixture of the specific ABX and CIN when tested simultaneously at their respective MICs in combination. Data are given as mean  $\pm$  standard deviation.

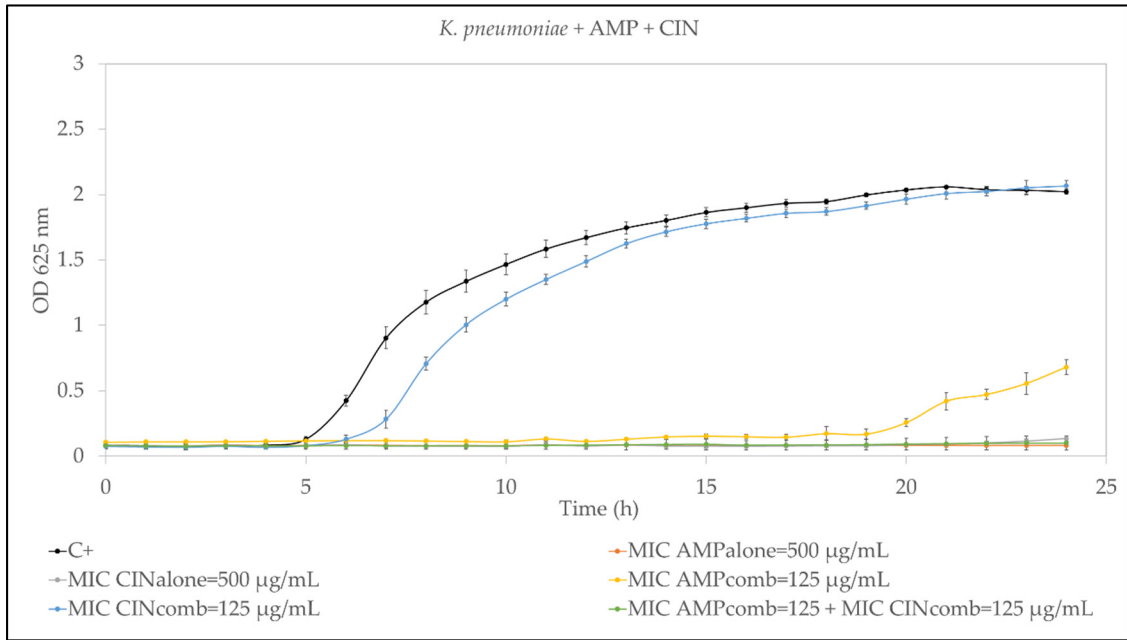

**Figure S6.** Kinetic study for cinnamaldehyde (CIN) and ampicillin (AMP) on *K. pneumoniae* (OD at 625 nm vs time (h)). C+: curve for positive control. MIC CIN<sub>alone</sub> and MIC ABX<sub>alone</sub> are the curves for CIN and the specific ABX, respectively, when each of them was tested alone at their respective MIC. MIC ABX<sub>comb</sub> is the curve for the specific ABX tested alone but added at its MIC when this and CIN were tested simultaneously. MIC CIN<sub>comb</sub> is the curve for CIN tested alone but added at its MIC when this and the specific ABX were tested simultaneously. (MIC ABX<sub>comb</sub>+MIC CIN<sub>comb</sub>) is the curve for the combination of the mixture of the specific ABX and CIN when tested simultaneously at their respective MICs in combination. Data are given as mean ± standard deviation.

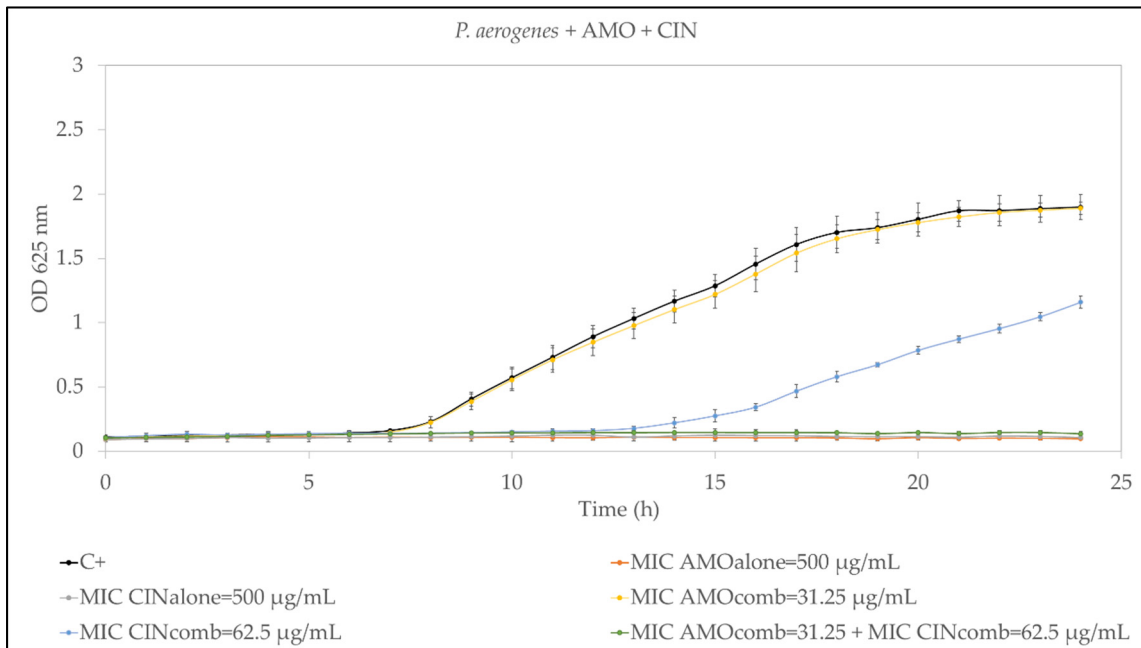

(a)

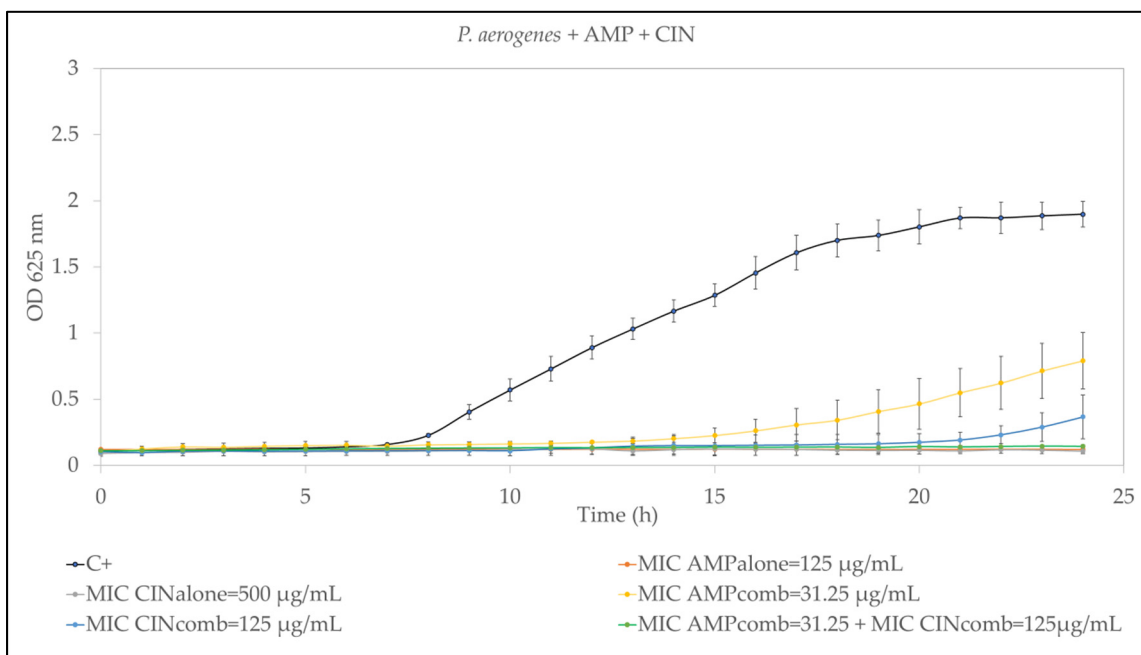

(b)

**Figure S7.** Kinetic study for cinnamaldehyde (CIN) and **a)** amoxicillin (AMO) or **b)** ampicillin (AMP) on *P. aerogenes* (OD at 625 nm vs time (h)). C+: curve for positive control. MIC CIN<sub>alone</sub> and MIC ABX<sub>alone</sub> are the curves for CIN and the specific ABX, respectively, when each of them was tested alone at their respective MIC. MIC ABX<sub>comb</sub> is the curve for the specific ABX tested alone but added at its MIC when this and CIN were tested simultaneously. MIC CIN<sub>comb</sub> is the curve for CIN tested alone but added at its MIC when this and the specific ABX were tested simultaneously. (MIC ABX<sub>comb</sub>+MIC CIN<sub>comb</sub>) is the curve for the combination of the mixture of the specific ABX and CIN when tested simultaneously at their respective MICs in combination. Data are given as mean  $\pm$  standard deviation.



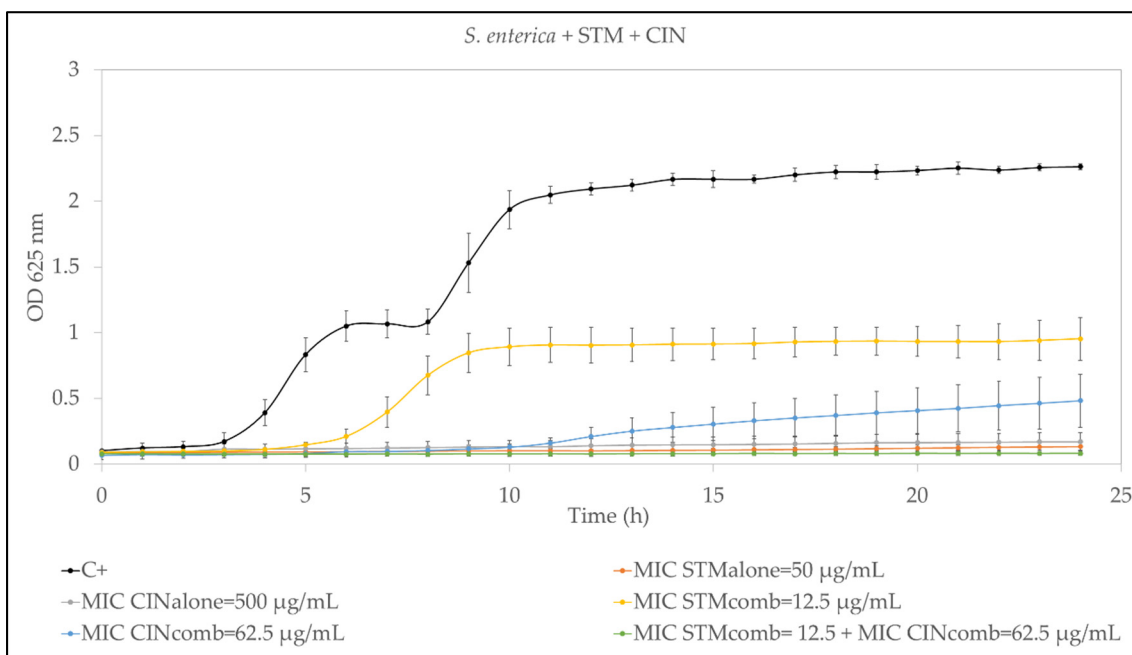

**Figure S8.** Kinetic study for cinnamaldehyde (CIN) and streptomycin (STM) on *S. enterica* (OD at 625 nm vs time (h)). C+: curve for positive control. MIC CIN<sub>alone</sub> and MIC ABX<sub>alone</sub> are the curves for CIN and the specific ABX, respectively, when each of them was tested alone at their respective MIC. MIC ABX<sub>comb</sub> is the curve for the specific ABX tested alone but added at its MIC when this and CIN were tested simultaneously. MIC CIN<sub>comb</sub> is the curve for CIN tested alone but added at its MIC when this and the specific ABX were tested simultaneously. (MIC ABX<sub>comb</sub>+MIC CIN<sub>comb</sub>) is the curve for the combination of the mixture of the specific ABX and CIN when tested simultaneously at their respective MICs in combination. Data are given as mean ± standard deviation.

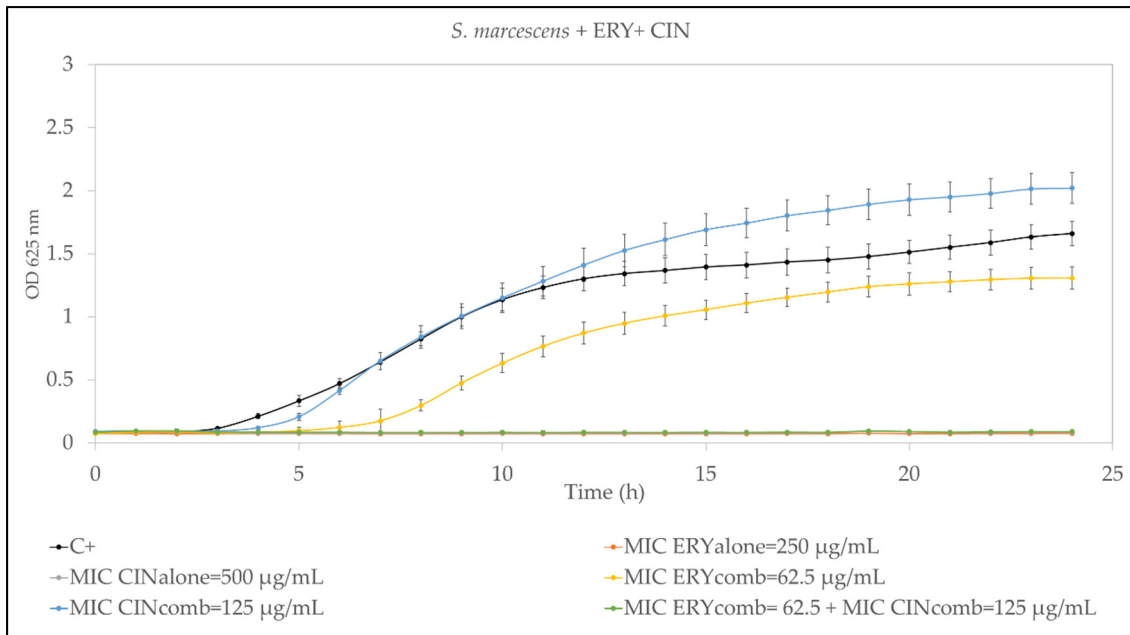

(a)

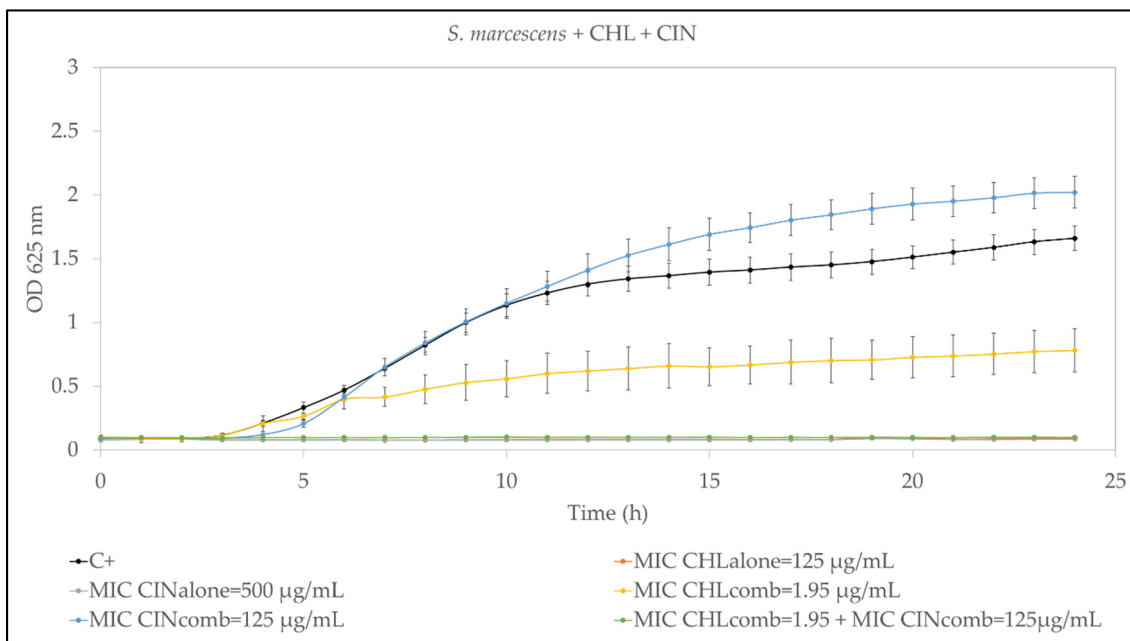

(b)

**Figure S9.** Kinetic study for cinnamaldehyde (CIN) and **a)** erythromycin (ERY) or **b)** chloramphenicol (CHL) on *S. marcescens* (OD at 625 nm vs time (h)). C+: curve for positive control. MIC CIN<sub>alone</sub> and MIC ABX<sub>alone</sub> are the curves for CIN and the specific ABX, respectively, when each of them was tested alone at their respective MIC. MIC ABX<sub>comb</sub> is the curve for the specific ABX tested alone but added at its MIC when this and CIN were tested simultaneously. MIC CIN<sub>comb</sub>, is the curve for CIN tested alone but added at its MIC when this and the specific ABX were tested simultaneously. (MIC ABX<sub>comb</sub>+MIC CIN<sub>comb</sub>) is the curve for the combination of the mixture of the specific ABX and CIN when tested simultaneously at their respective MICs in combination. Data are given as mean ± standard deviation.
